# Supplementary material
Source: Royal Society of Chemistry journal article supplement (doi:10.1039/d6ay00267f)
Supplement: d6ay00267f1.pdf [file d6ay00267f1.pdf]

1  
2  
3  
4  
5  
6  
7  
8  
9  
10  
11  
12  
13  
14  
15  
16  
17  
18  
19  
20  
21  
22  
23  
24

## Supporting Information

### **A Portable Near-Infrared Aptasensor Platform for Derivatization-Assisted On-Site Analysis of Acrylamide in Food Samples**

Lingli Bu<sup>1</sup>, Meixing Liu<sup>1</sup>, Qihang Yang<sup>5</sup>, Xinkai Li<sup>5</sup>, Minglei Li<sup>5</sup>, Luyao Li<sup>1\*</sup>, Song Wang<sup>4\*</sup>, Sheng Lei<sup>3\*</sup>, Jiaheng Zhang<sup>2\*</sup>

<sup>1</sup> Henan Linker Technology Key Laboratory, College of Advanced Interdisciplinary Science and Technology (CAIST), Henan University of Technology, Zhengzhou 450001, China.

<sup>2</sup> College of Chemistry, Zhengzhou University, Zhengzhou 450001, China

<sup>3</sup> Department of Clinical Laboratory, The First Affiliated Hospital of Guangzhou Medical University, Guangzhou Medical University, Guangzhou, Guangdong 510120, China.

<sup>4</sup> Hubei Yangtze Memory Laboratories, Wuhan 430205, China

<sup>5</sup> China Tobacco Guangdong Industrial Co., Ltd., Guangzhou, Guangdong 510630, China

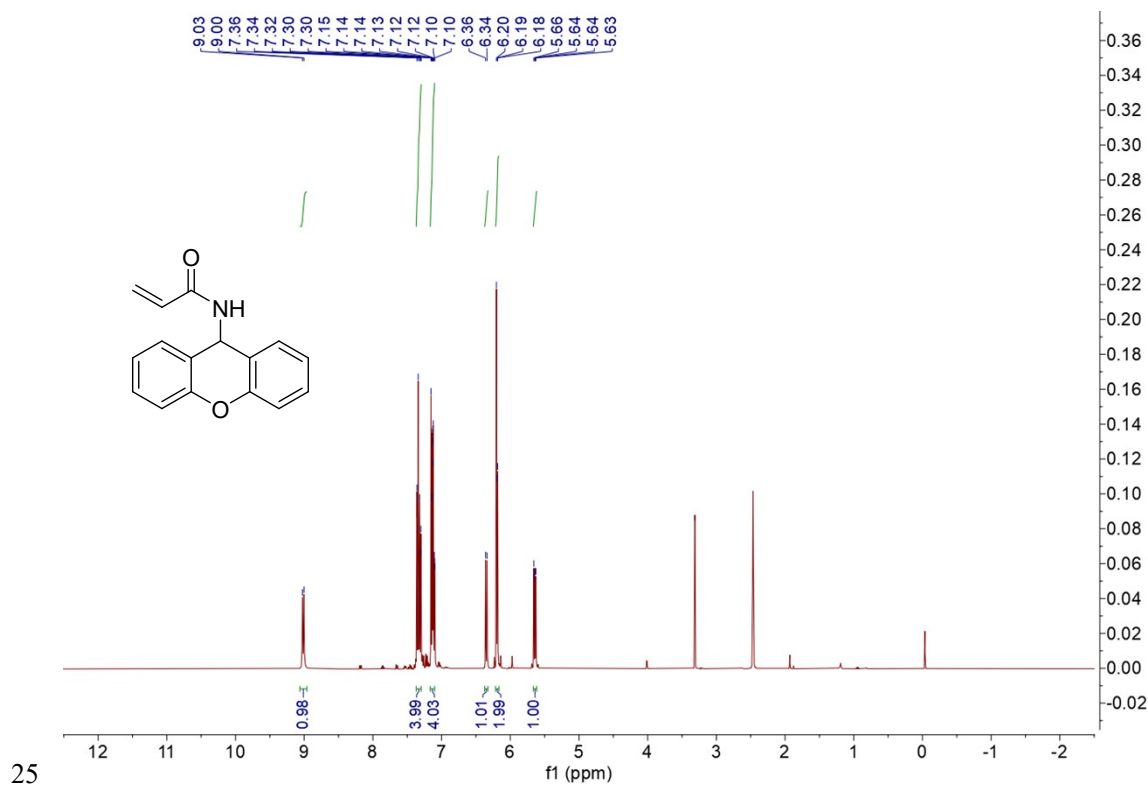

26 **FigureS1** NMR spectra of XAA.  $^1\text{H NMR}$  (400 MHz,  $\text{DMSO-}d_6$ )  $\delta$  9.01 (d,  $J = 8.7$  Hz,  
 27 1H), 7.37 – 7.30 (m, 4H), 7.16 – 7.10 (m, 4H), 6.35 (d,  $J = 8.7$  Hz, 1H), 6.21 – 6.16 (m,  
 28 2H), 5.64 (dd,  $J = 7.4, 4.9$  Hz, 1H).

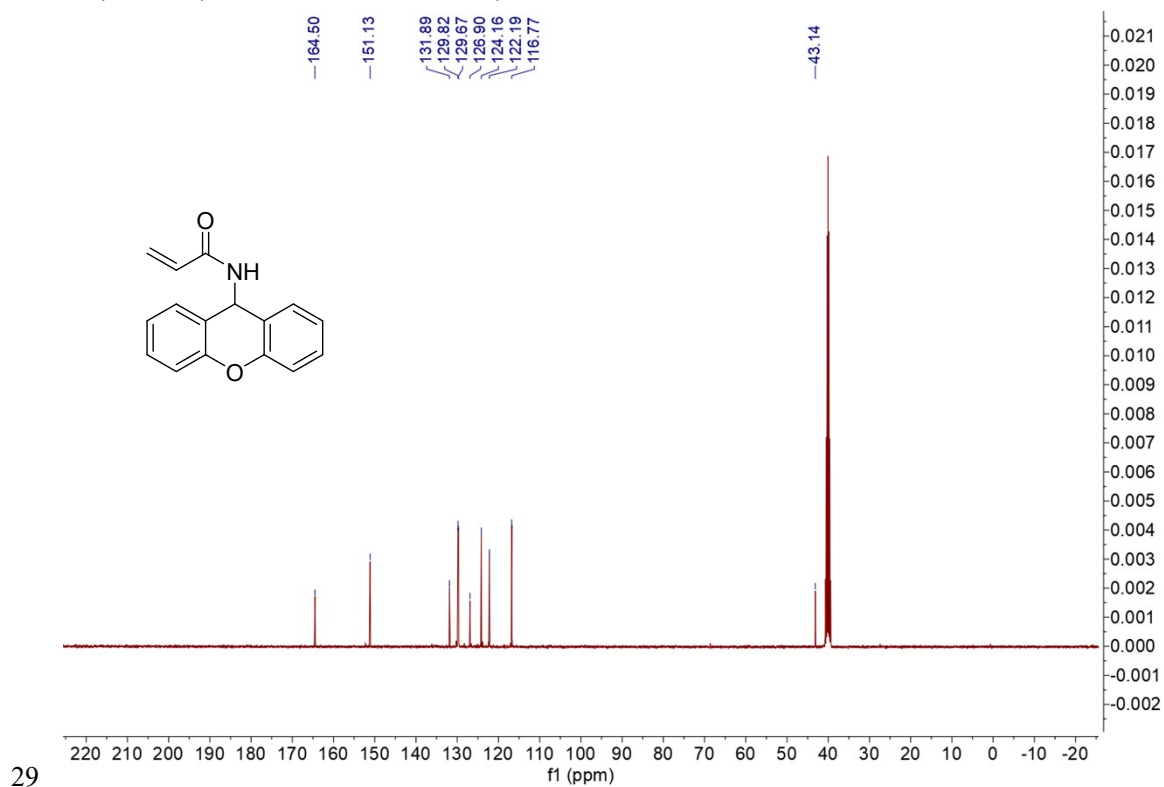

30 **FigureS2** NMR spectra of XAA.  $^{13}\text{C NMR}$  (101 MHz,  $\text{DMSO-}d_6$ )  $\delta$  164.50, 151.13,  
 31 131.89, 129.82, 129.67, 126.90, 124.16, 122.19, 116.77, 43.14.

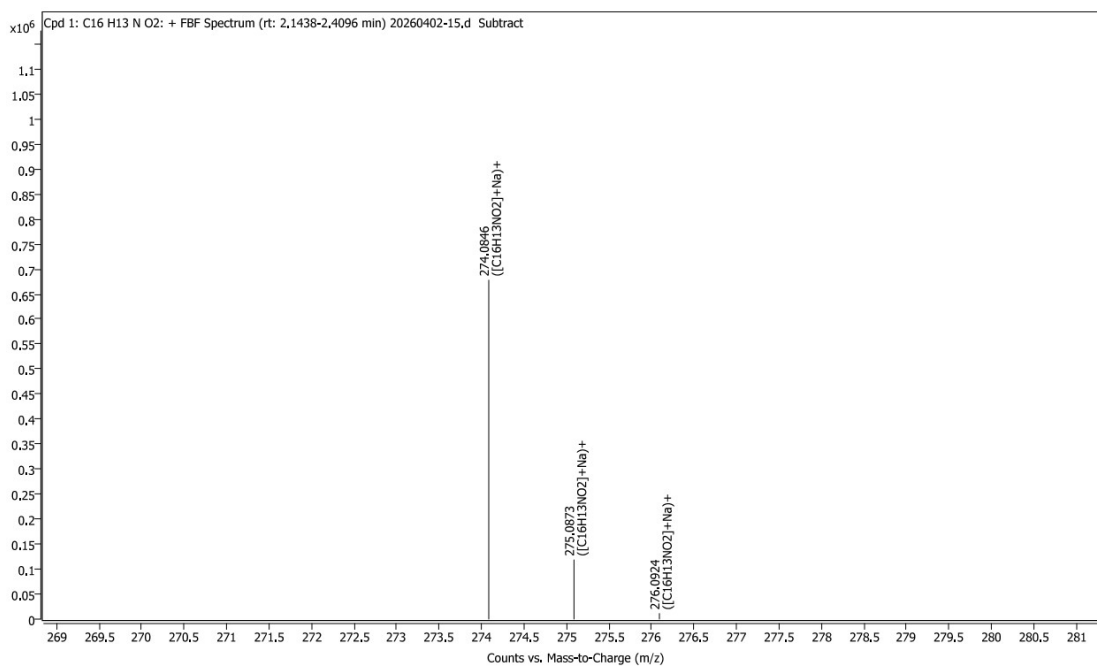

32

33 **FigureS3** HRMS (ESI) spectrum of XAA.

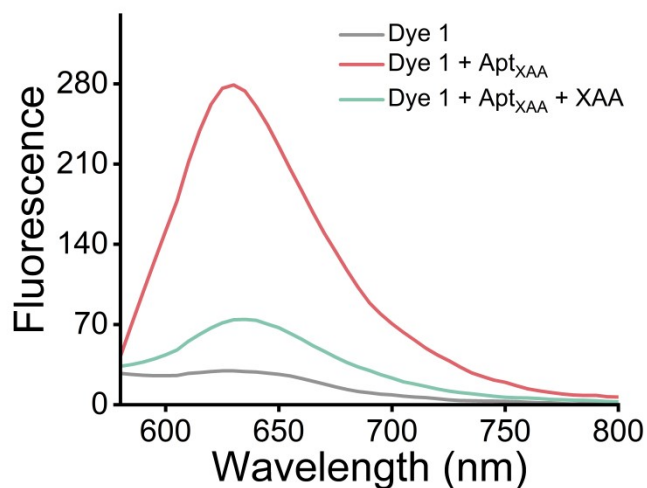

34

35 **Fig. S4** Fluorescence spectra ( $\lambda_{\text{ex}} = 540 \text{ nm}$ ) of Solvent Violet 8 ( $10 \mu\text{M}$ ) upon binding  
 36 to Apt<sub>XAA</sub> ( $5 \mu\text{M}$ ) and subsequent competition with XAA ( $50 \mu\text{M}$ ) in HEPES buffer.

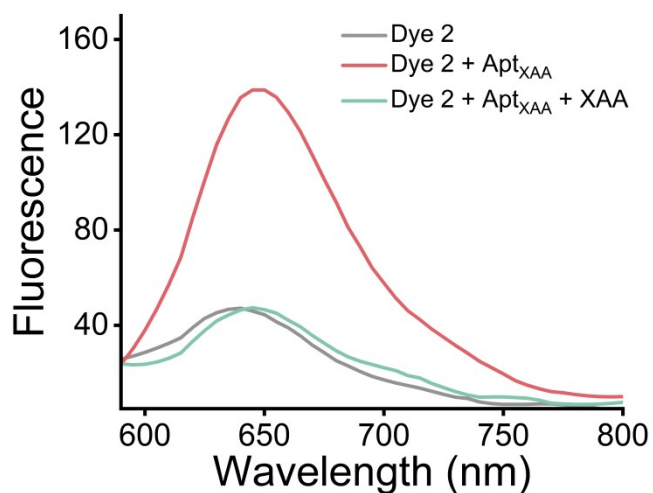

37

38 **Fig. S5** Fluorescence spectra ( $\lambda_{\text{ex}} = 550 \text{ nm}$ ) of Ethyl Violet ( $10 \mu\text{M}$ ) upon binding to

39 Apt<sub>XAA</sub> ( $5 \mu\text{M}$ ) and subsequent competition with XAA ( $50 \mu\text{M}$ ) in HEPES buffer.

40

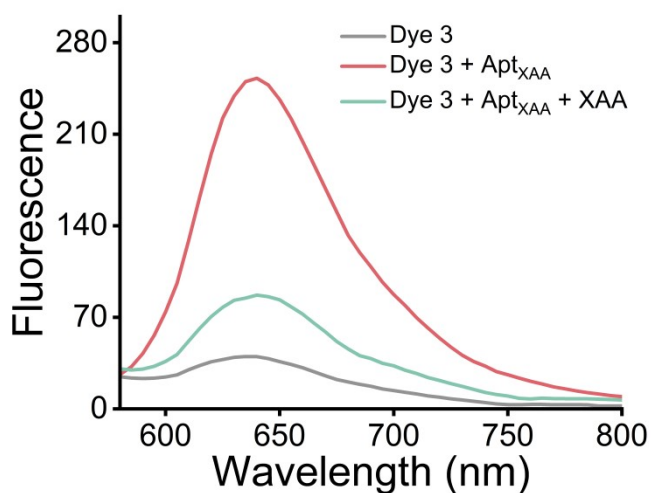

41

42 **Fig. S6** Fluorescence spectra ( $\lambda_{\text{ex}} = 540 \text{ nm}$ ) of Crystal Violet ( $10 \mu\text{M}$ ) upon binding

43 to Apt<sub>XAA</sub> ( $5 \mu\text{M}$ ) and subsequent competition with XAA ( $50 \mu\text{M}$ ) in HEPES buffer.

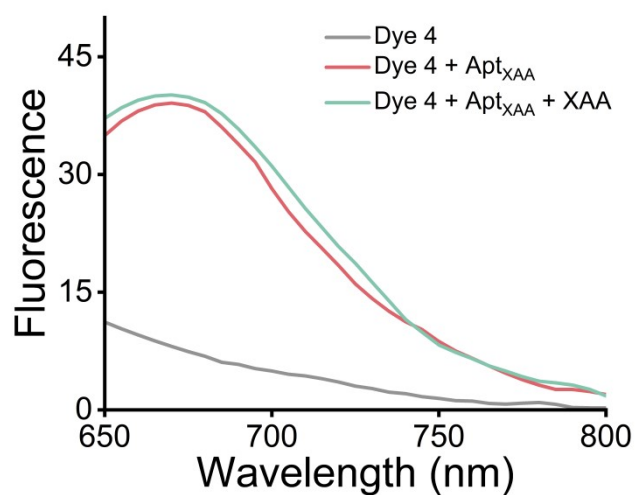

44

45 **Fig. S7** Fluorescence spectra ( $\lambda_{\text{ex}} = 600 \text{ nm}$ ) of Methyl Green ( $10 \mu\text{M}$ ) upon binding to

46  $\text{Apt}_{\text{XAA}}$  ( $5 \mu\text{M}$ ) and subsequent competition with XAA ( $50 \mu\text{M}$ ) in HEPES buffer.

47

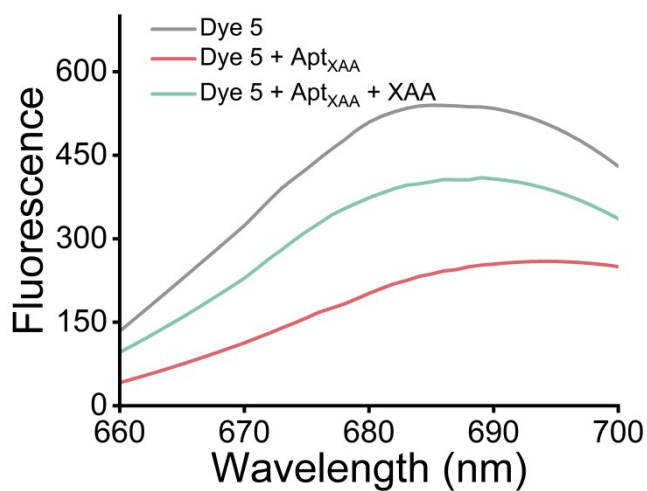

48

49 **Fig. S8** Fluorescence spectra ( $\lambda_{\text{ex}} = 600 \text{ nm}$ ) of Basic Blue 11 ( $10 \mu\text{M}$ ) upon binding to

50  $\text{Apt}_{\text{XAA}}$  ( $5 \mu\text{M}$ ) and subsequent competition with XAA ( $50 \mu\text{M}$ ) in HEPES buffer.

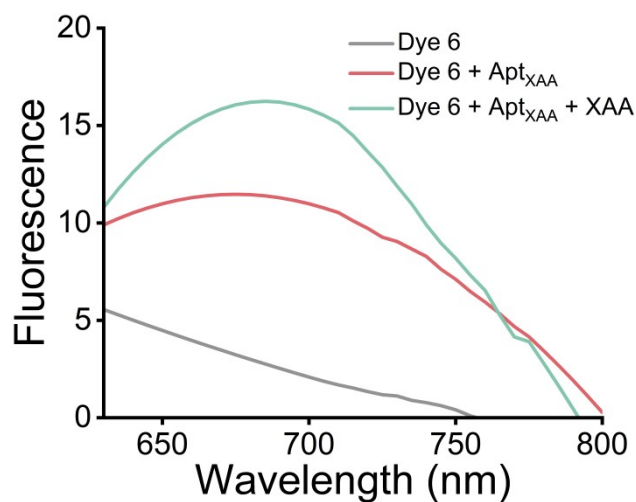

51

52 **Fig. S9** Fluorescence spectra ( $\lambda_{\text{ex}} = 585 \text{ nm}$ ) of Basic Blue 26 ( $10 \mu\text{M}$ ) upon binding to  
 53 Apt<sub>XAA</sub> ( $5 \mu\text{M}$ ) and subsequent competition with XAA ( $50 \mu\text{M}$ ) in HEPES buffer.

54

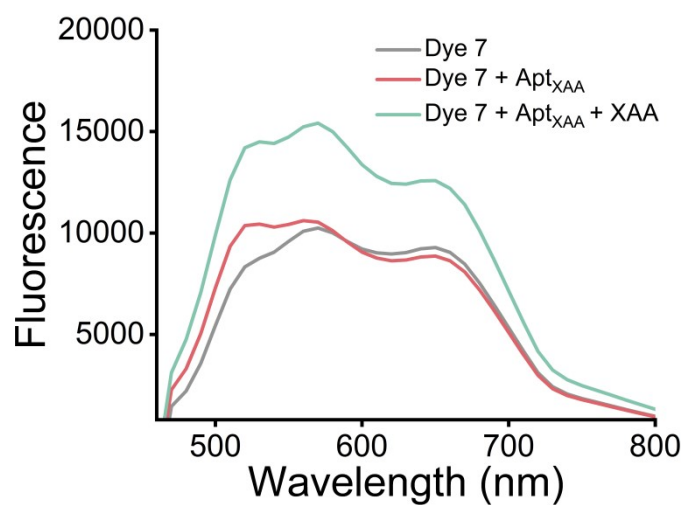

55

56 **Fig. S10** Fluorescence spectra ( $\lambda_{\text{ex}} = 400 \text{ nm}$ ) of Basic Coumarin 6 ( $10 \mu\text{M}$ ) upon  
 57 binding to Apt<sub>XAA</sub> ( $5 \mu\text{M}$ ) and subsequent competition with XAA ( $50 \mu\text{M}$ ) in HEPES  
 58 buffer.

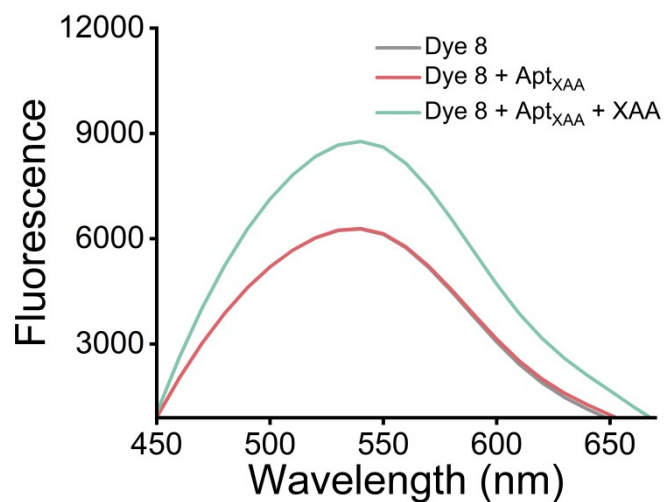

59

60 **Fig. S11** Fluorescence spectra ( $\lambda_{\text{ex}} = 410 \text{ nm}$ ) of S2153 ( $10 \mu\text{M}$ ) upon binding to Apt<sub>XAA</sub>

61 ( $5 \mu\text{M}$ ) and subsequent competition with XAA ( $50 \mu\text{M}$ ) in HEPES buffer.

62

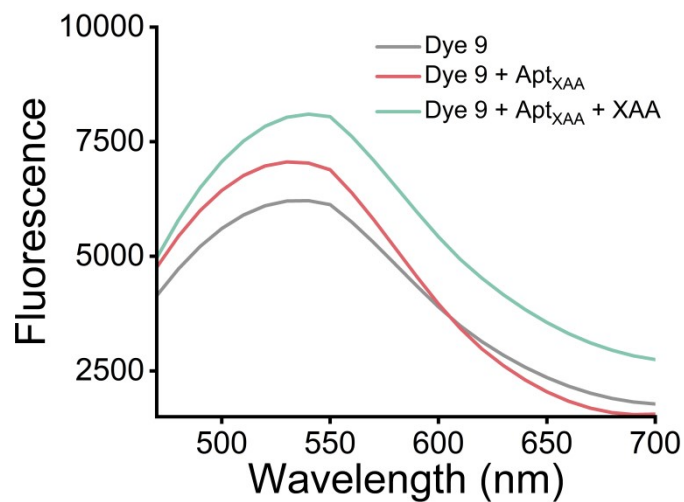

63

64 **Fig. S12** Fluorescence spectra ( $\lambda_{\text{ex}} = 430 \text{ nm}$ ) of 3OUMARIN 525 ( $10 \mu\text{M}$ ) upon

65 binding to Apt<sub>XAA</sub> ( $5 \mu\text{M}$ ) and subsequent competition with XAA ( $50 \mu\text{M}$ ) in HEPES

66 buffer.

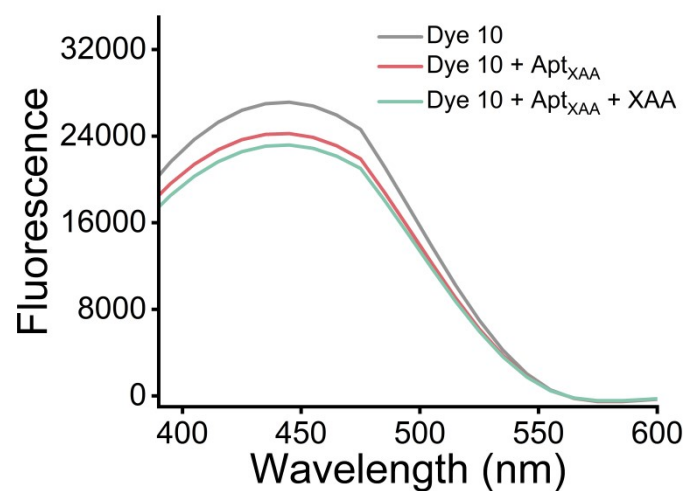

67

68 **Fig. S13** Fluorescence spectra ( $\lambda_{\text{ex}} = 345 \text{ nm}$ ) of Coumarin 478 ( $10 \mu\text{M}$ ) upon binding

69 to Apt<sub>XAA</sub> ( $5 \mu\text{M}$ ) and subsequent competition with XAA ( $50 \mu\text{M}$ ) in HEPES buffer.

70

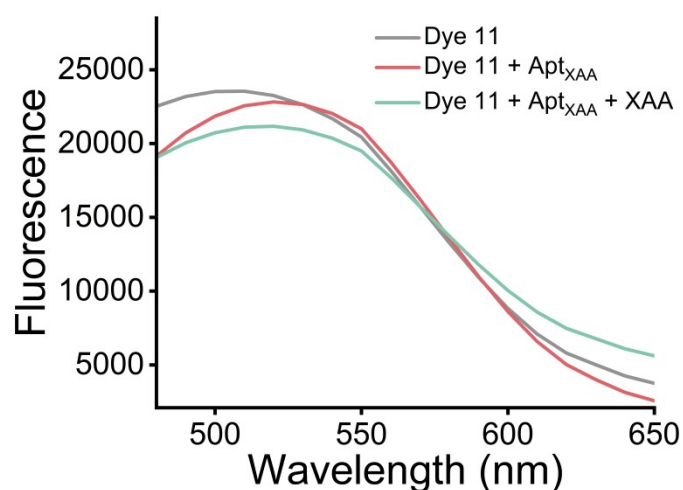

71

72 **Fig. S14** Fluorescence spectra ( $\lambda_{\text{ex}} = 450 \text{ nm}$ ) of Exciton Coumarin 545 ( $10 \mu\text{M}$ ) upon

73 binding to Apt<sub>XAA</sub> ( $5 \mu\text{M}$ ) and subsequent competition with XAA ( $50 \mu\text{M}$ ) in HEPES

74 buffer.

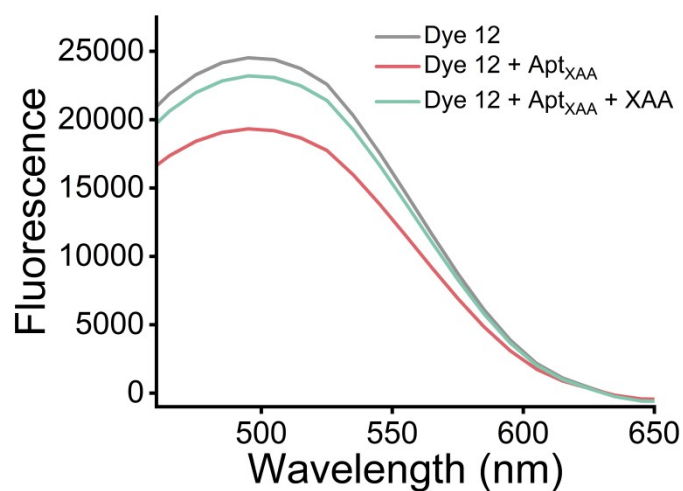

75

76 **Fig. S15** Fluorescence spectra ( $\lambda_{\text{ex}} = 415 \text{ nm}$ ) of Coumarin 30 ( $10 \mu\text{M}$ ) upon binding to

77 Apt<sub>XAA</sub> ( $5 \mu\text{M}$ ) and subsequent competition with XAA ( $50 \mu\text{M}$ ) in HEPES buffer.

78

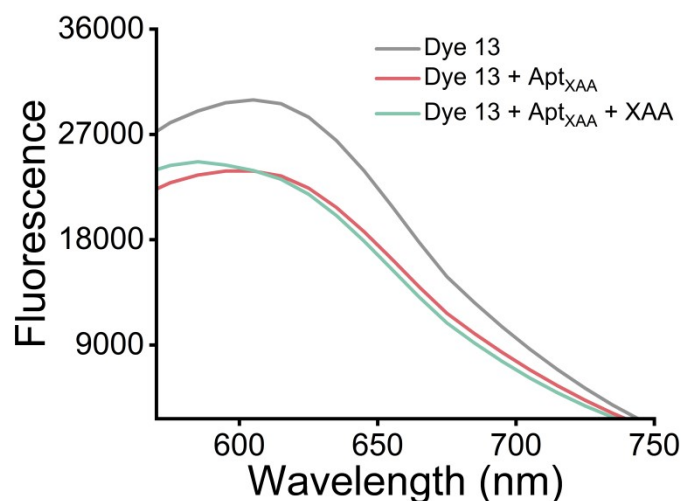

79

80 **Fig. S16** Fluorescence spectra ( $\lambda_{\text{ex}} = 475 \text{ nm}$ ) of Coumarin 545T ( $10 \mu\text{M}$ ) upon binding

81 to Apt<sub>XAA</sub> ( $5 \mu\text{M}$ ) and subsequent competition with XAA ( $50 \mu\text{M}$ ) in HEPES buffer.

82

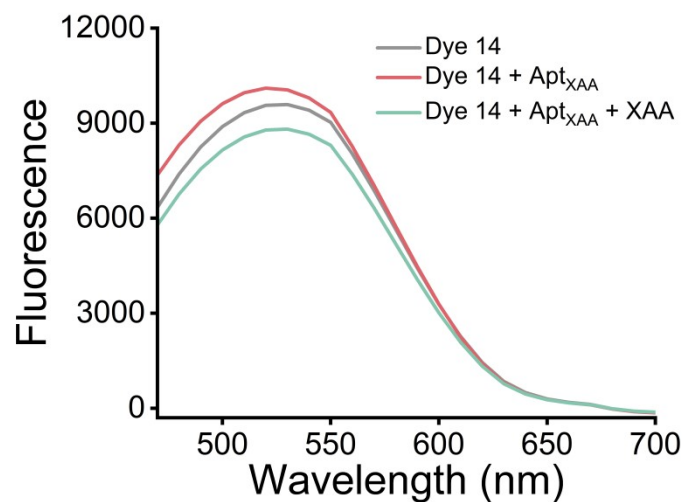

83

84 **Fig. S17** Fluorescence spectra ( $\lambda_{\text{ex}} = 430 \text{ nm}$ ) of Coumarin 510 ( $10 \mu\text{M}$ ) upon binding

85 to Apt<sub>XAA</sub> ( $5 \mu\text{M}$ ) and subsequent competition with XAA ( $50 \mu\text{M}$ ) in HEPES buffer.

86

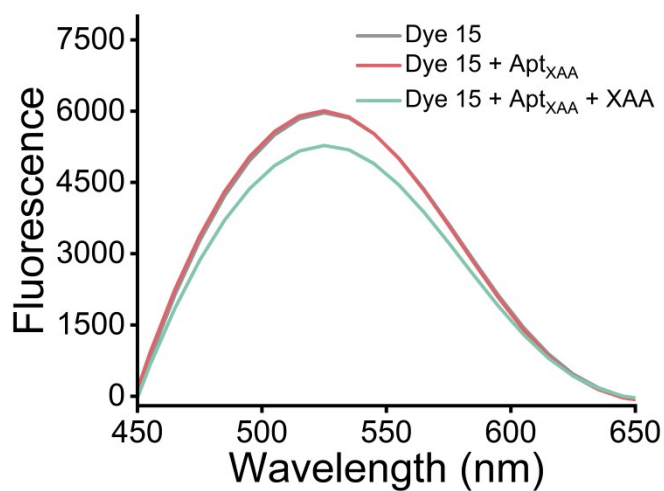

87

88 **Fig. S18** Fluorescence spectra ( $\lambda_{\text{ex}} = 405 \text{ nm}$ ) of Coumarin 73 ( $10 \mu\text{M}$ ) upon binding to

89 Apt<sub>XAA</sub> ( $5 \mu\text{M}$ ) and subsequent competition with XAA ( $50 \mu\text{M}$ ) in HEPES buffer.

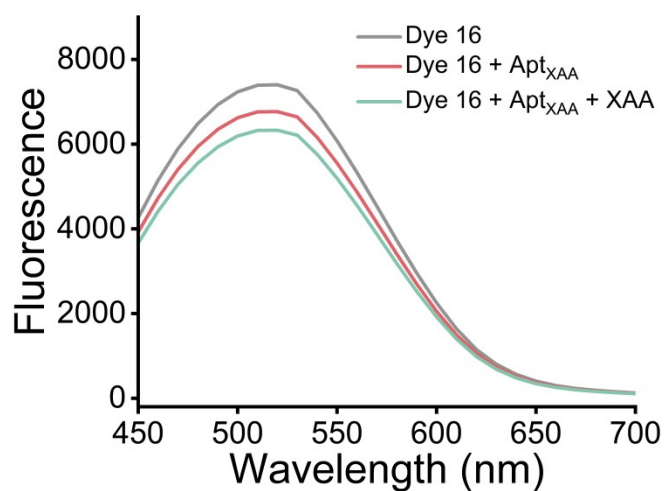

90

91 **Fig. S19** Fluorescence spectra ( $\lambda_{\text{ex}} = 400 \text{ nm}$ ) of Coumarin 151 ( $10 \mu\text{M}$ ) upon binding  
 92 to  $\text{Apt}_{\text{XAA}}$  ( $5 \mu\text{M}$ ) and subsequent competition with XAA ( $50 \mu\text{M}$ ) in HEPES buffer.

93

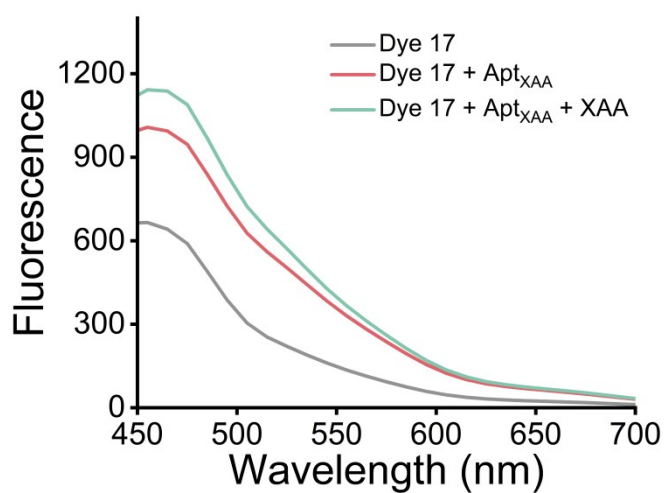

94

95 **Fig. S20** Fluorescence spectra ( $\lambda_{\text{ex}} = 395 \text{ nm}$ ) of 3',6'-Dimethoxyfluoran ( $10 \mu\text{M}$ ) upon  
 96 binding to  $\text{Apt}_{\text{XAA}}$  ( $5 \mu\text{M}$ ) and subsequent competition with XAA ( $50 \mu\text{M}$ ) in HEPES  
 97 buffer.

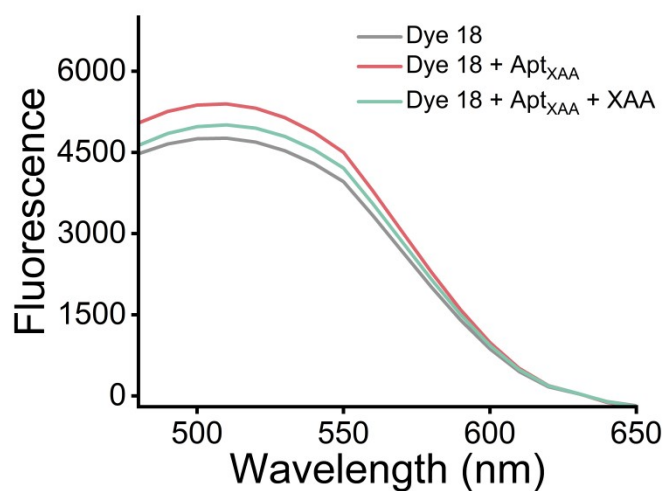

98

99 **Fig. S21** Fluorescence spectra ( $\lambda_{\text{ex}} = 440 \text{ nm}$ ) of Fluorexon ( $10 \mu\text{M}$ ) upon binding to  
 100 Apt<sub>XAA</sub> ( $5 \mu\text{M}$ ) and subsequent competition with XAA ( $50 \mu\text{M}$ ) in HEPES buffer.

101

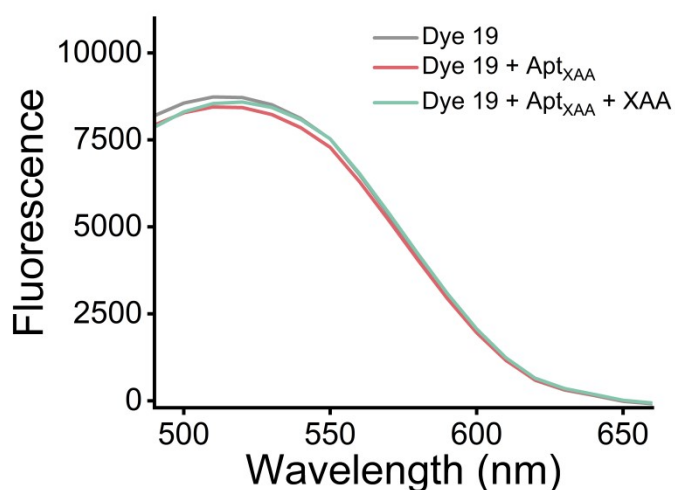

102

103 **Fig. S22** Fluorescence spectra ( $\lambda_{\text{ex}} = 450 \text{ nm}$ ) of 6-Carboxyfluorescein ( $10 \mu\text{M}$ ) upon  
 104 binding to Apt<sub>XAA</sub> ( $5 \mu\text{M}$ ) and subsequent competition with XAA ( $50 \mu\text{M}$ ) in HEPES  
 105 buffer.

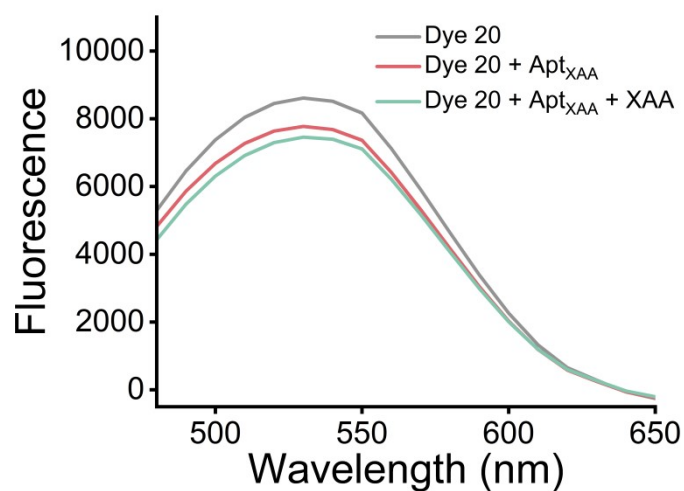

106

107 **Fig. S23** Fluorescence spectra ( $\lambda_{\text{ex}} = 440 \text{ nm}$ ) of Fluorescein ( $10 \mu\text{M}$ ) upon binding to

108  $\text{Apt}_{\text{XAA}}$  ( $5 \mu\text{M}$ ) and subsequent competition with XAA ( $50 \mu\text{M}$ ) in HEPES buffer.

109

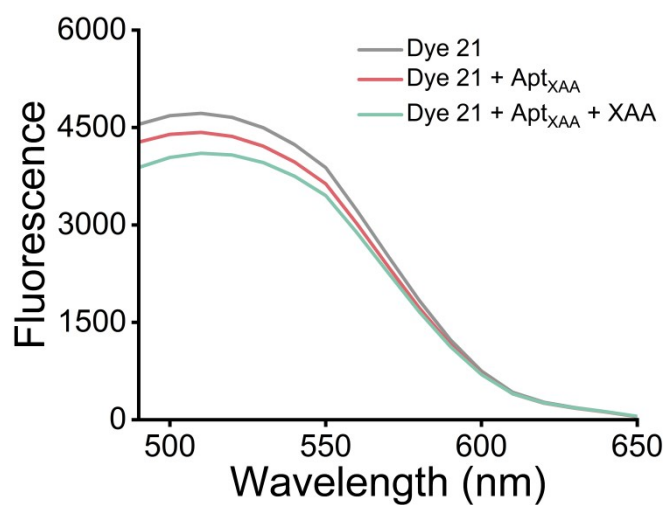

110

111 **Fig. S24** Fluorescence spectra ( $\lambda_{\text{ex}} = 420 \text{ nm}$ ) of Fluorescein Sodium ( $10 \mu\text{M}$ ) upon

112 binding to  $\text{Apt}_{\text{XAA}}$  ( $5 \mu\text{M}$ ) and subsequent competition with XAA ( $50 \mu\text{M}$ ) in HEPES

113 buffer.

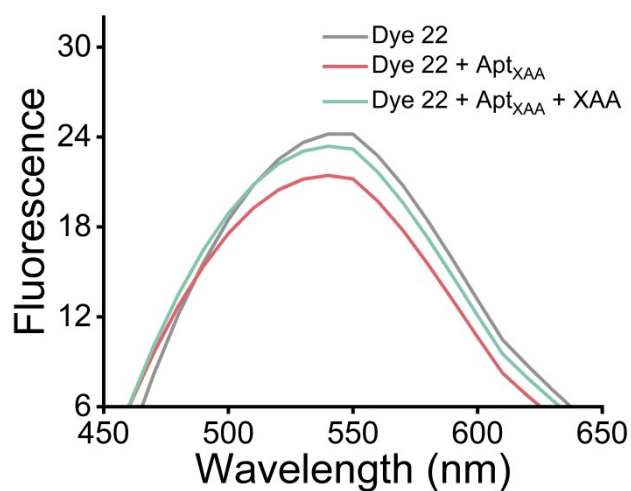

114

115 **Fig. S25** Fluorescence spectra ( $\lambda_{\text{ex}} = 410 \text{ nm}$ ) of 3',6'-Dichlorofluoran ( $10 \mu\text{M}$ ) upon  
 116 binding to Apt<sub>XAA</sub> ( $5 \mu\text{M}$ ) and subsequent competition with XAA ( $50 \mu\text{M}$ ) in HEPES  
 117 buffer.

118

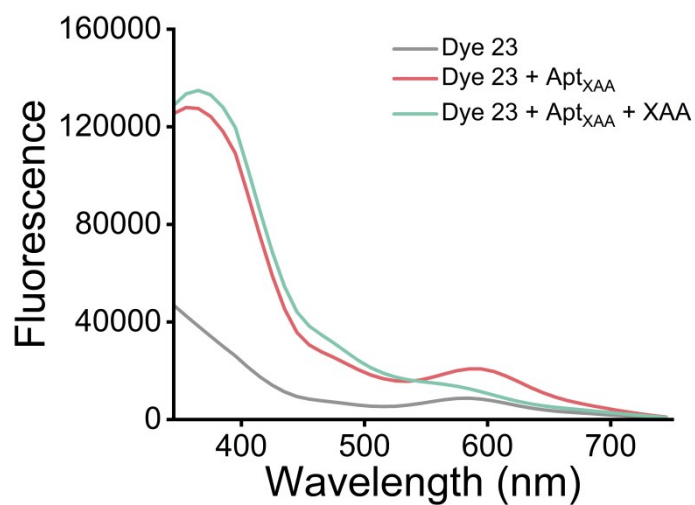

119

120 **Fig. S26** Fluorescence spectra ( $\lambda_{\text{ex}} = 295 \text{ nm}$ ) of 2-(2-aminoethyl) Rhodamine B amide  
 121 ( $10 \mu\text{M}$ ) upon binding to Apt<sub>XAA</sub> ( $5 \mu\text{M}$ ) and subsequent competition with XAA ( $50$   
 122  $\mu\text{M}$ ) in HEPES buffer.

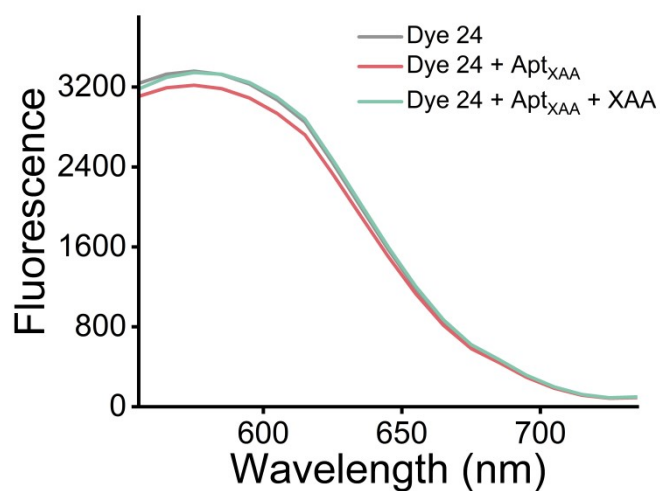

123

124 **Fig. S27** Fluorescence spectra ( $\lambda_{\text{ex}} = 510 \text{ nm}$ ) of Sulforhodamine B ( $10 \mu\text{M}$ ) upon  
 125 binding to Apt<sub>XAA</sub> ( $5 \mu\text{M}$ ) and subsequent competition with XAA ( $50 \mu\text{M}$ ) in HEPES  
 126 buffer.

127

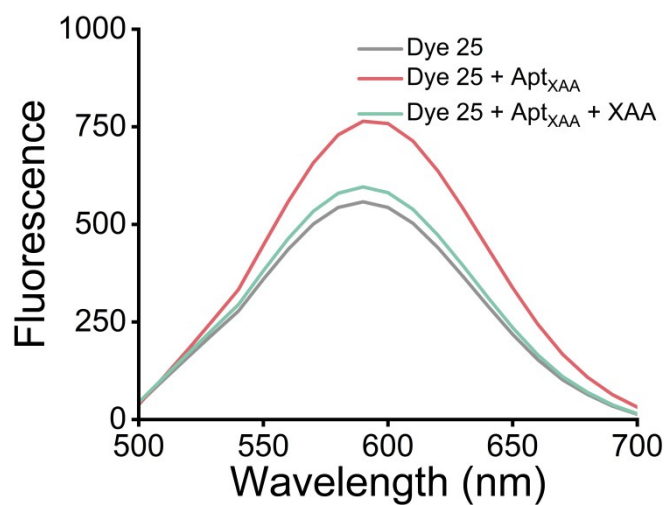

128

129 **Fig. S28** Fluorescence spectra ( $\lambda_{\text{ex}} = 420 \text{ nm}$ ) of Rhodamine B ( $10 \mu\text{M}$ ) upon binding  
 130 to Apt<sub>XAA</sub> ( $5 \mu\text{M}$ ) and subsequent competition with XAA ( $50 \mu\text{M}$ ) in HEPES buffer.

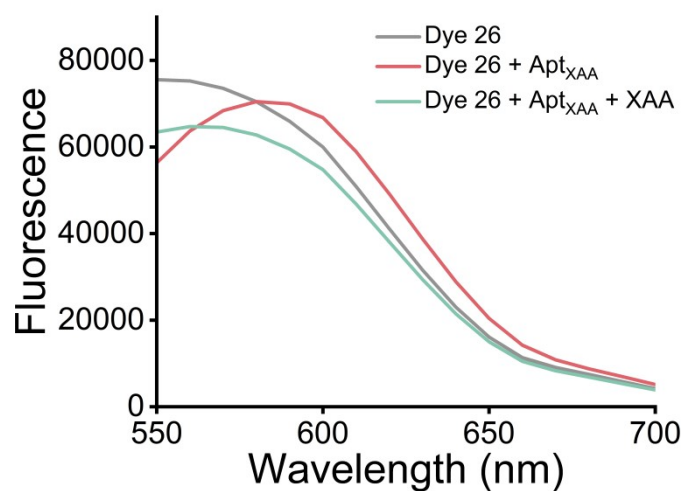

131

132 **Fig. S29** Fluorescence spectra ( $\lambda_{\text{ex}} = 510 \text{ nm}$ ) of Pyronin B ( $10 \mu\text{M}$ ) upon binding to

133 Apt<sub>XAA</sub> ( $5 \mu\text{M}$ ) and subsequent competition with XAA ( $50 \mu\text{M}$ ) in HEPES buffer.

134

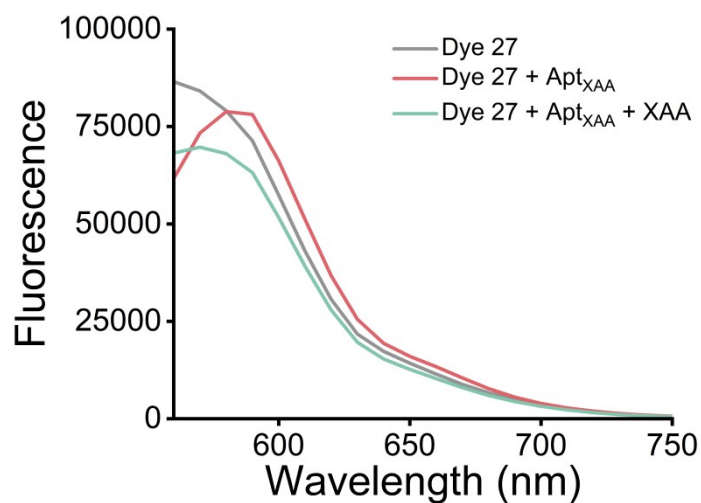

135

136 **Fig. S30** Fluorescence spectra ( $\lambda_{\text{ex}} = 510 \text{ nm}$ ) of Pyronin Y ( $10 \mu\text{M}$ ) upon binding to

137 Apt<sub>XAA</sub> ( $5 \mu\text{M}$ ) and subsequent competition with XAA ( $50 \mu\text{M}$ ) in HEPES buffer.

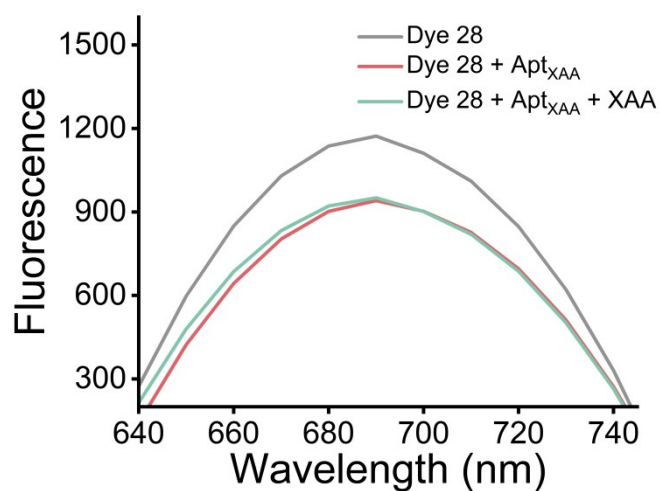

138

139 **Fig. S31** Fluorescence spectra ( $\lambda_{\text{ex}} = 600 \text{ nm}$ ) of OXAZINE 1 ( $10 \mu\text{M}$ ) upon binding to

140 Apt<sub>XAA</sub> ( $5 \mu\text{M}$ ) and subsequent competition with XAA ( $50 \mu\text{M}$ ) in HEPES buffer.

141

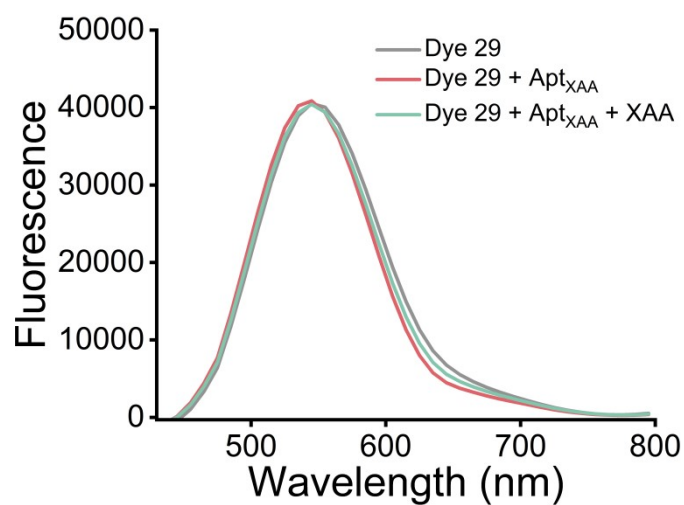

142

143 **Fig. S32** Fluorescence spectra ( $\lambda_{\text{ex}} = 465 \text{ nm}$ ) of Basic Orange 14 ( $10 \mu\text{M}$ ) upon binding

144 to Apt<sub>XAA</sub> ( $5 \mu\text{M}$ ) and subsequent competition with XAA ( $50 \mu\text{M}$ ) in HEPES buffer.

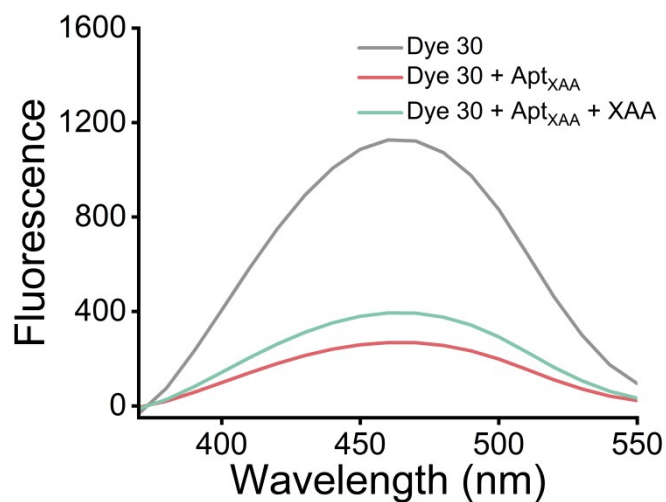

145

146 **Fig. S33** Fluorescence spectra ( $\lambda_{\text{ex}} = 250 \text{ nm}$ ) of 9-Aminoacridine ( $10 \text{ }\mu\text{M}$ ) upon  
 147 binding to Apt<sub>XAA</sub> ( $5 \text{ }\mu\text{M}$ ) and subsequent competition with XAA ( $50 \text{ }\mu\text{M}$ ) in HEPES  
 148 buffer.

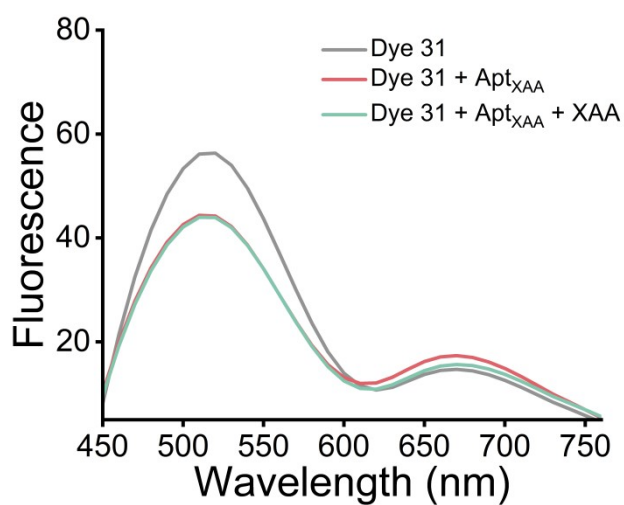

149

150 **Fig. S34** Fluorescence spectra ( $\lambda_{\text{ex}} = 380 \text{ nm}$ ) of BODIPY(R) 493/503 ( $10 \text{ }\mu\text{M}$ ) upon  
 151 binding to Apt<sub>XAA</sub> ( $5 \text{ }\mu\text{M}$ ) and subsequent competition with XAA ( $50 \text{ }\mu\text{M}$ ) in HEPES  
 152 buffer.

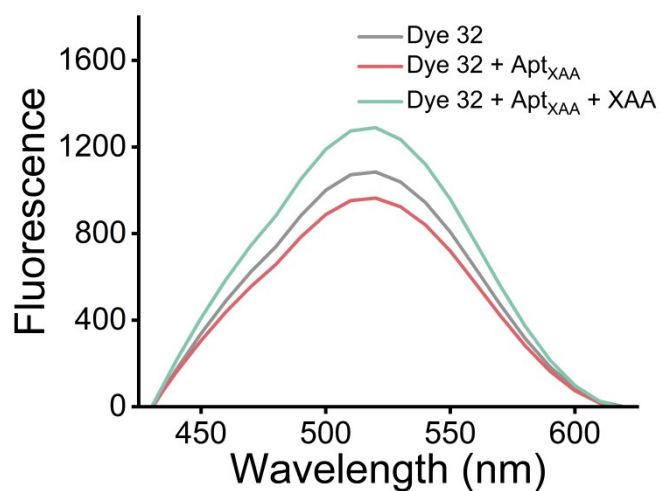

153

154 **Fig. S35** Fluorescence spectra ( $\lambda_{\text{ex}} = 360 \text{ nm}$ ) of 8-Phenyl-BODIPY 505/515 ( $10 \mu\text{M}$ )

155 upon binding to Apt<sub>XAA</sub> ( $5 \mu\text{M}$ ) and subsequent competition with XAA ( $50 \mu\text{M}$ ) in H

156 EPES buffer.

157

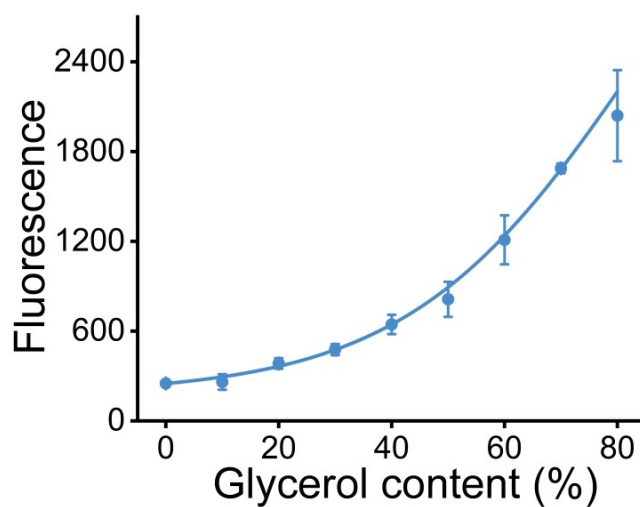

158

159 **Fig. S36** Effect of solvent viscosity on the fluorescence of MV in glycerol/ethylene

160 glycol mixtures.

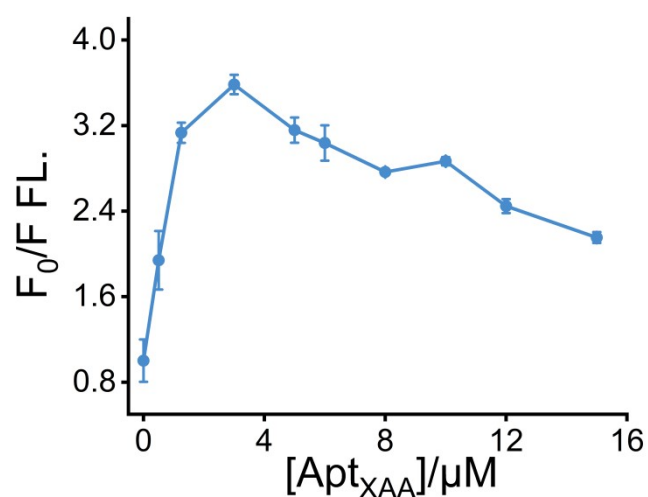

161

162 **Fig. S37** Normalized fluorescence responses of MV complexed with different aptamer

163 concentrations, referenced to signals after addition of XAA.

164

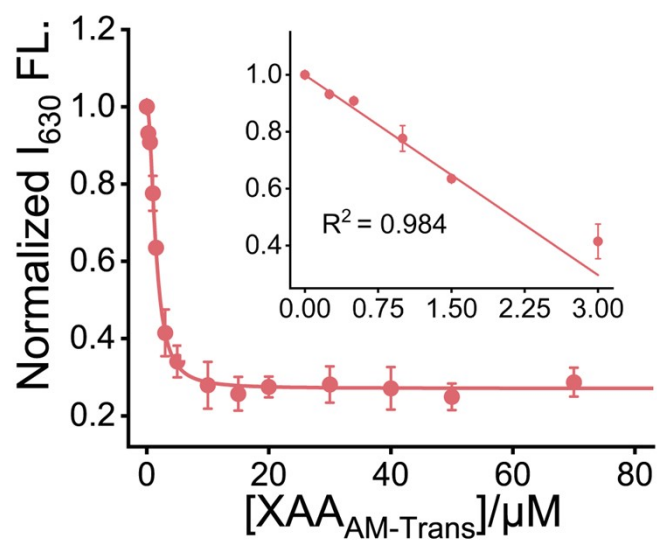

165

166 **Fig. S38** Fluorescence intensity of MV-Apt<sub>XAA</sub> complexes measured at different XAA<sub>A</sub>

167 M-Trans concentrations.

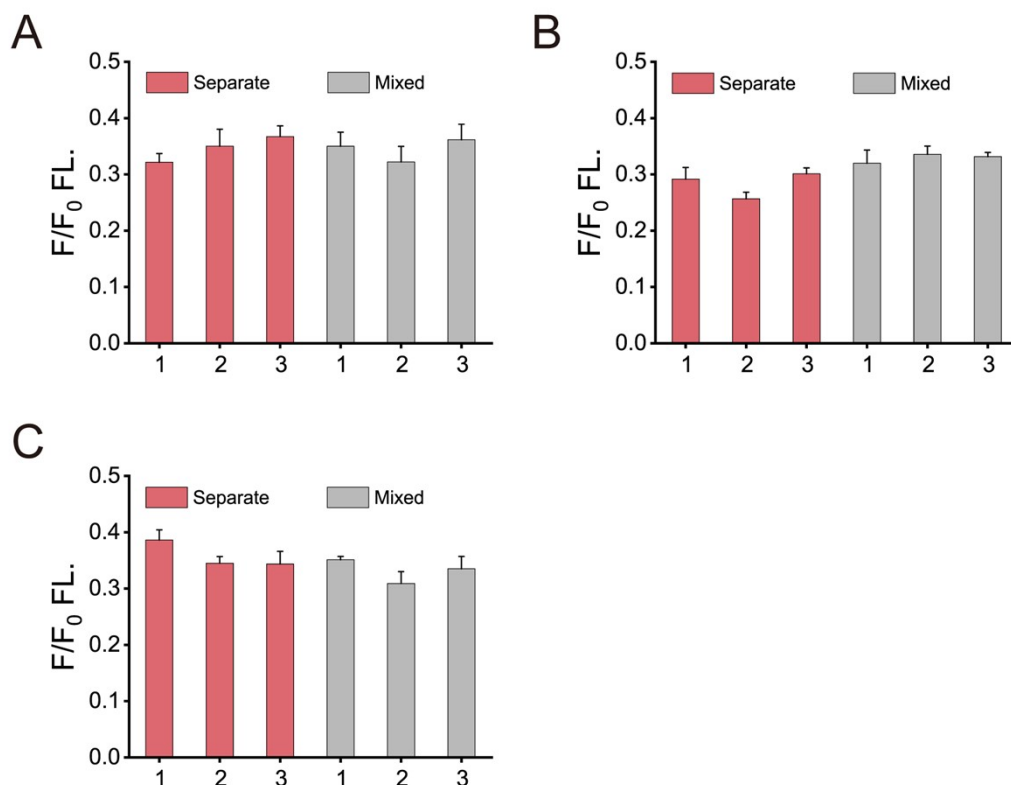

168

169 **Figure S39.** Storage stability of MV, Apt<sub>XAA</sub>, and the MV- Apt<sub>XAA</sub> complex for  
 170 XAA<sub>AM-Trans</sub> sensing after storage -20 °C (A), 4 °C (B), and 25 °C (C) for 1, 2 and 3  
 171 days. In the “separate” mode, MV and Apt<sub>XAA</sub> were stored independently and mixed  
 172 before testing; In the “mixed” mode, the pre-formed complex was stored prior to  
 173 measurement.

174

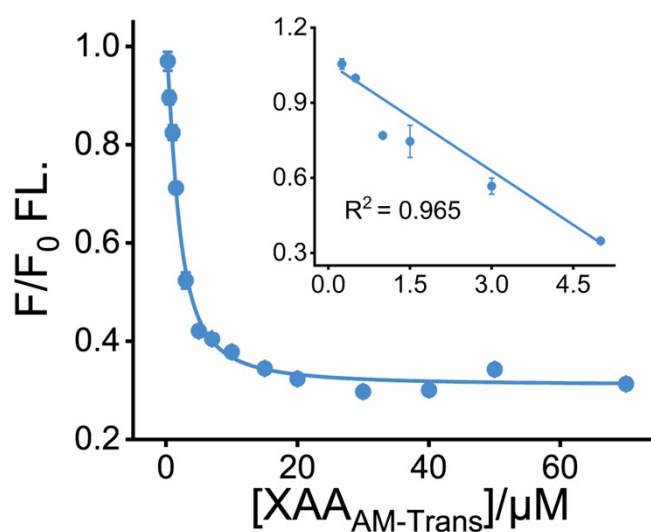

175

176 **Fig. S40** Fluorescence intensity of MV-Apt<sub>XAA</sub> complexes measured by POCT  
 177 platform at different XAA<sub>AM-Trans</sub> concentrations.

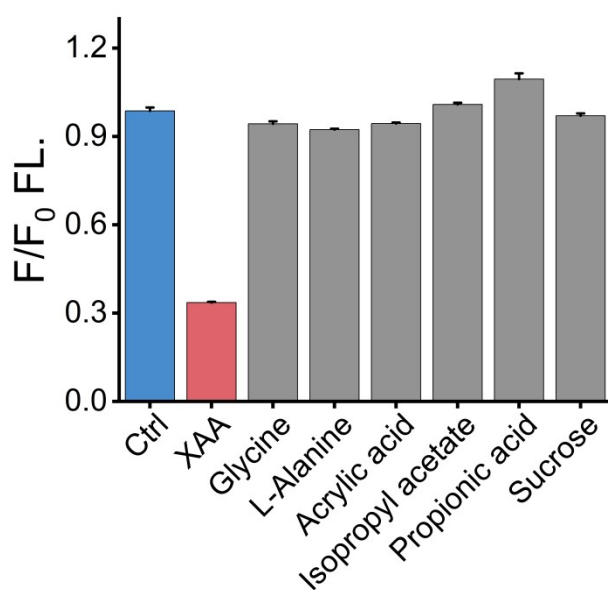

178

179 **Fig. S41** Selectivity of MV-Apt<sub>XAA</sub> complexes for XAA measured by POCT platform.

180

181 **Table S1.** Summary of existing detection technologies based on aptamers for  
182 acrylamide.

| Response time | Linear range           | Signal response            | LOD                | Ref.                                       |
|---------------|------------------------|----------------------------|--------------------|--------------------------------------------|
| 10 min        | 1–60 $\mu\text{M}$     | Fluorescence               | 0.28 $\mu\text{M}$ | Microchem. J. 199 (2024) 110215            |
| 70 min        | 0.05–200 nM            | Fluorescence               | 0.038 nM           | Food Chem. 399 (2025) 133938               |
| 305 min       | 0.01–500 nM            | Fluorescence               | 1.802 pM           | Food Chem. 493 (2025) 145944               |
| 95 min        | 10nM–0.5 mM            | Fluorescence               | 1.9 nM             | J. Agric. Food Chem.70 (2022) 10065-10074. |
| 25.5 min      | 1–10 <sup>5</sup> nM   | Fluorescence               | 1.13nM             | Biosens. Bioelectron. 215 (2022) 114581.   |
| 50 min        | 0.01–100 $\mu\text{M}$ | colorimetric               | 1.53 nM            | Anal. Chim. Acta. 1288 (2024) 342150.      |
| 50 min        | /                      | SERS                       | 0.326 nM           | Spectrochim. Acta A 351 (2026) 127322.     |
| 30 min        | /                      | Fluorescence /colorimetric | 1.00 nM/1.07 nM    | J. Hazard. Mater. 466 (2024) 133369.       |
| 33 min        | 0.25-5 $\mu\text{M}$   | Fluorescence               | 048 $\mu\text{M}$  | This work                                  |

183

184

185 **Table S2.** Estimation of XAA<sub>AM-Trans</sub> in Potato Chips.

| Sample                 | Added<br>( $\mu\text{M}$ ) | Found<br>( $\mu\text{M}$ ) | Recovery<br>(%) | RSD<br>(%, n = 3) |
|------------------------|----------------------------|----------------------------|-----------------|-------------------|
| Potato<br>Chips (1:20) | 0.5                        | 0.55                       | 110.67          | 9.01              |
|                        | 0.75                       | 0.83                       | 110.04          | 7.92              |
|                        | 1                          | 0.92                       | 91.78           | 7.74              |
|                        | 1.5                        | 1.43                       | 95.45           | 7.04              |
|                        | 2                          | 1.96                       | 98.09           | 6.71              |

186
